# Supplementary figures and images for: Measuring Patient Experience and Patient Satisfaction—How Are We Doing It and Why Does It Matter? A Comparison of European and U.S. American Approaches
Source: MDPI journal article supplement (doi:10.3390/healthcare11060797), 2023-03-08

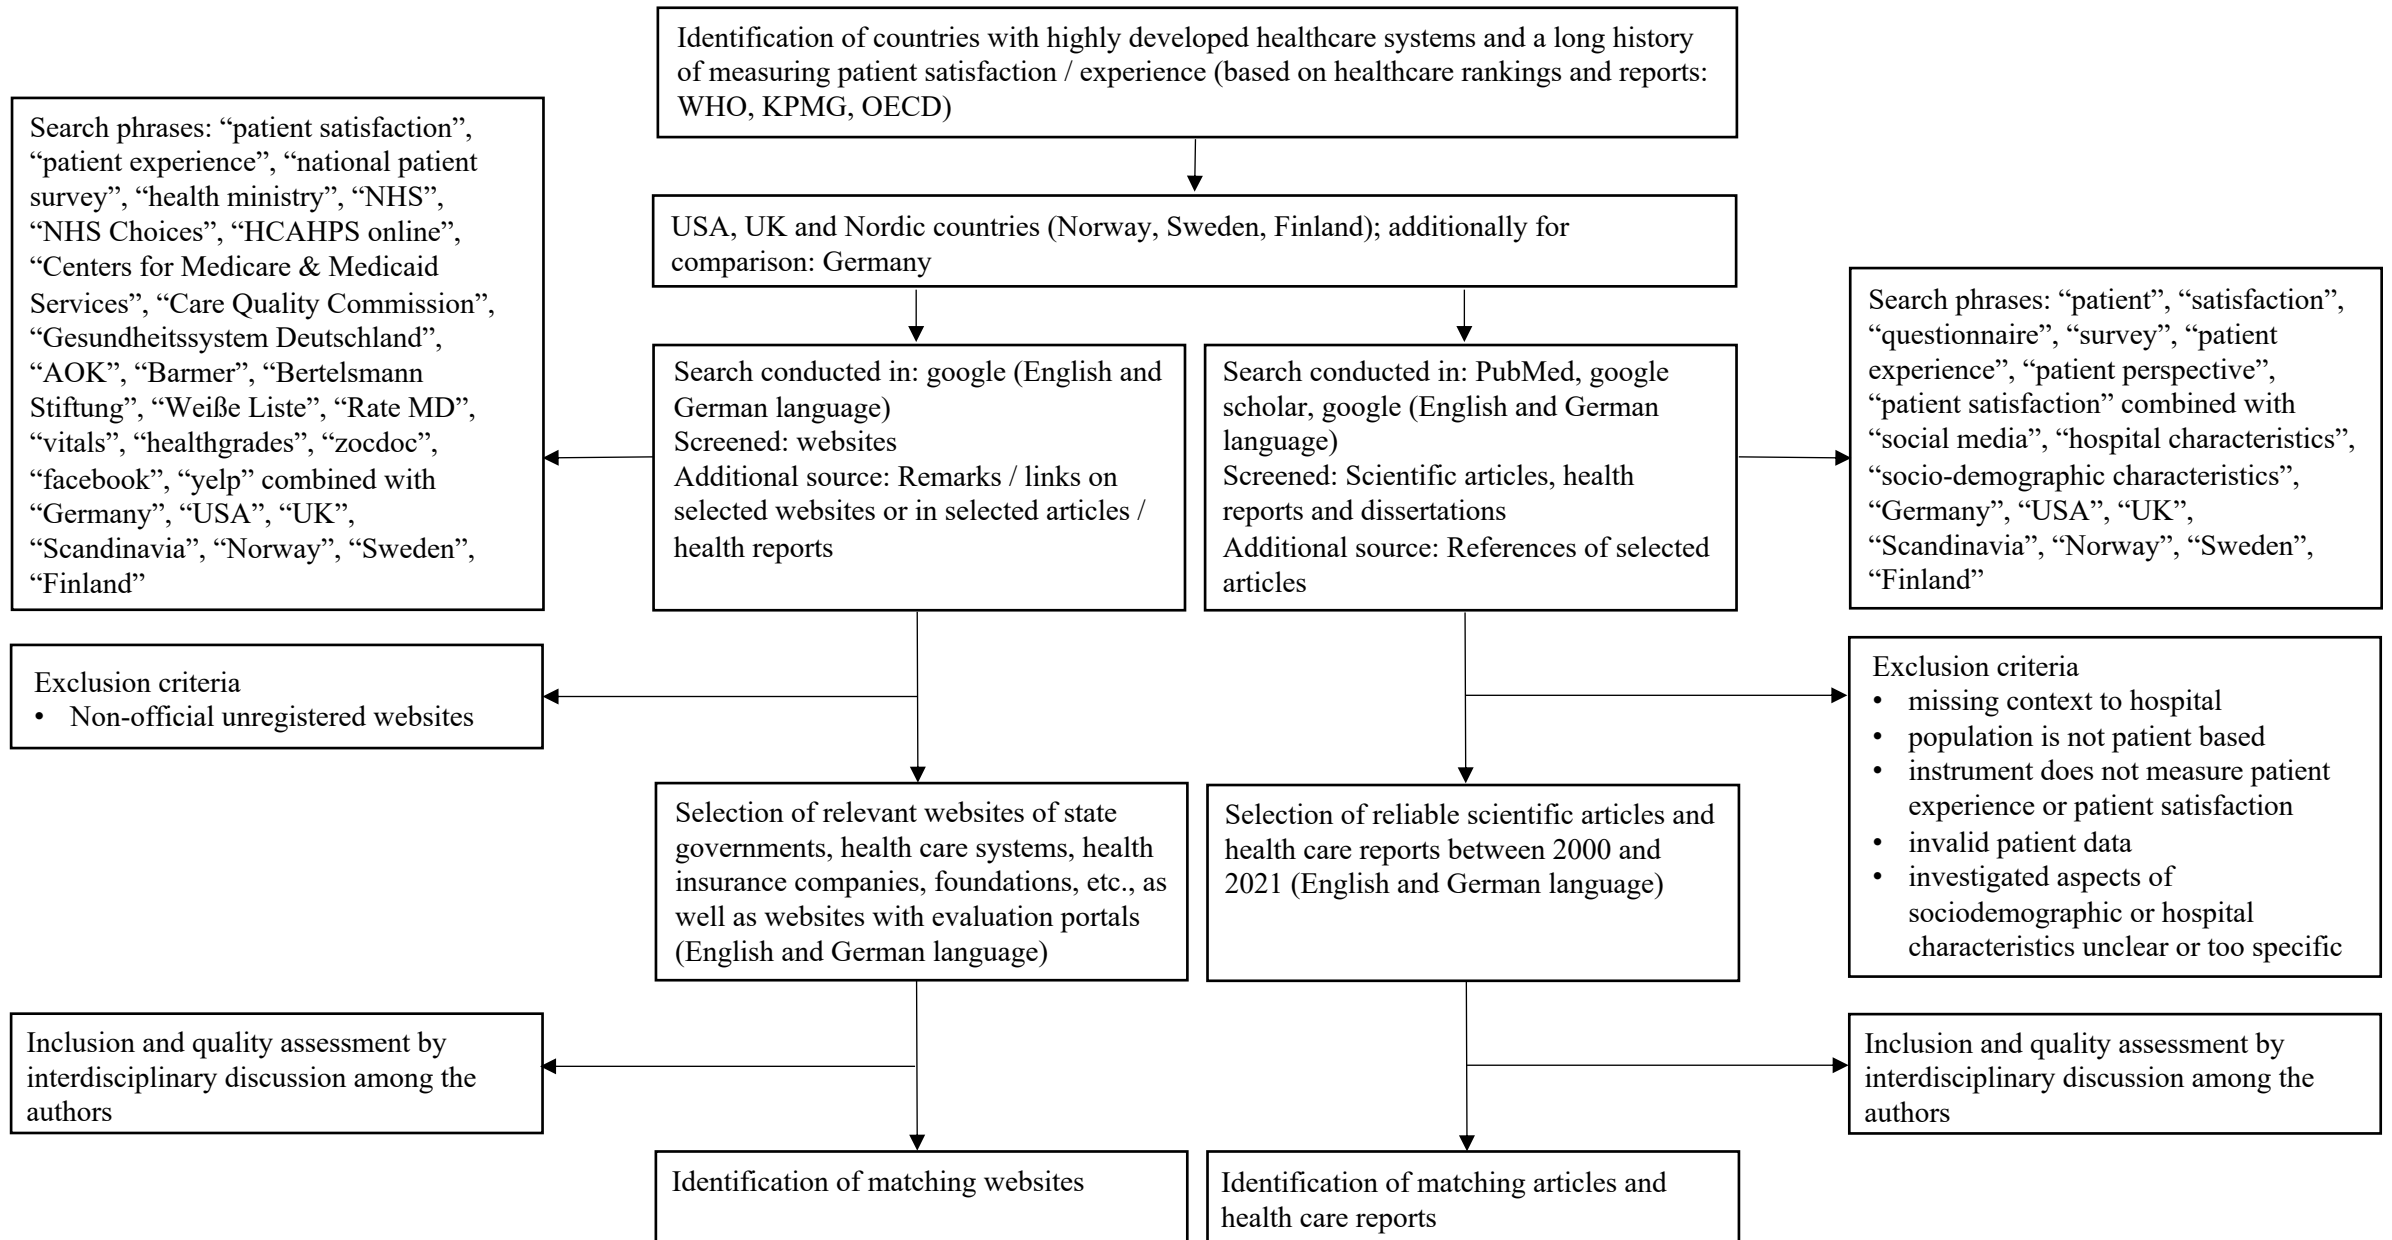

Supplement: s1 [file s1]
